# Supplementary material for: DFT Modelling of Molecular Structure, Vibrational and UV-Vis Absorption Spectra of T-2 Toxin and 3-Deacetylcalonectrin
Source: MDPI journal article supplement (doi:10.3390/ma15020649), 2022-01-15
Supplement: s1 [file s1]

# DFT modelling of T-2 toxin and 3-deacetylcalonecitrin structures and their vibrational and UV-Vis absorption spectra

**Table S1.** Selected structural parameters of T-2 and 3-deacetylcalonecitrin molecules. The notations are taken from figure 2 and figure 3

|                            |                    | T-2 toxin       |             |             |            |            | 3-deacetylcalonecitrin |                        |
|----------------------------|--------------------|-----------------|-------------|-------------|------------|------------|------------------------|------------------------|
|                            |                    | Theory          |             |             | Experiment |            |                        | Theory                 |
|                            |                    | Notations       | Conformer 1 | Conformer 2 | Molecule 1 | Molecule 2 | Notations              | Lowest found conformer |
| A<br>-<br>r<br>i<br>n<br>g | Bonds, Å           | C1-C2           | 1.330       | 1.330       | 1.320      | 1.317      | C1-C2                  | 1.331                  |
|                            |                    | C2-C31          | 1.505       | 1.507       | 1.493      | 1.469      | C2-C28                 | 1.507                  |
|                            |                    | C31-C23         | 1.530       | 1.529       | 1.510      | 1.509      | C28-C20                | 1.532                  |
|                            |                    | C23-C22         | 1.544       | 1.544       | 1.549      | 1.552      | C20-C19                | 1.545                  |
|                            |                    | C22-C26         | 1.556       | 1.556       | 1.547      | 1.549      | C19-C23                | 1.555                  |
|                            |                    | C26-C1          | 1.501       | 1.501       | 1.481      | 1.493      | C23-C1                 | 1.503                  |
|                            | Angles, °          | C1-C2-C31       | 120.9       | 120.8       | 121.4      | 121.7      | C1-C2-C28              | 121.1                  |
|                            |                    | C2-C31-C23      | 114.5       | 114.4       | 113.9      | 115.2      | C2-C28-C20             | 113.1                  |
|                            |                    | C31-C23-C22     | 115.0       | 115.1       | 114.4      | 115.6      | C28-C20-C19            | 112.5                  |
|                            |                    | C23-C22-C26     | 108.0       | 107.8       | 107.9      | 107.0      | C20-C19-C23            | 107.6                  |
|                            |                    | C22-C26-C1      | 114.4       | 114.4       | 114.2      | 114.4      | C19-C23-C1             | 114.1                  |
|                            |                    | C26-C1-C2       | 125.3       | 125.4       | 125.4      | 124.8      | C23-C1-C2              | 124.9                  |
|                            | Dihedral angles, ° | C1-C2-C31-C23   | 9.3         | 9.1         | 12.9       | 8.6        | C1-C2-C28-C20          | 15.7                   |
|                            |                    | C2-C31-C23-C22  | -38.7       | -38.7       | -41.2      | -36.6      | C2-C28-C20-C19         | -46.6                  |
|                            |                    | C31-C23-C22-C26 | 54.0        | 54.2        | 54.9       | 52.5       | C28-C20-C19-C23        | 59.2                   |
|                            |                    | C23-C22-C26-C1  | -41.9       | -42.2       | -42.6      | -42.6      | C20-C19-C23-C1         | -42.2                  |
|                            |                    | C22-C26-C1-C2   | 16.3        | 16.5        | 16.9       | 19.2       | C19-C23-C1-C2          | 14.1                   |
|                            |                    | C26-C1-C2-C31   | 1.6         | 1.7         | -1.0       | -0.1       | C23-C1-C2-C28          | 0.5                    |
| B<br>-<br>r<br>i<br>n<br>g | Bonds, Å           | O5-C26          | 1.453       | 1.453       | 1.444      | 1.451      | O5-C23                 | 1.454                  |
|                            |                    | C22-C3          | 1.593       | 1.593       | 1.589      | 1.580      | C19-C3                 | 1.585                  |
|                            |                    | C3-C21          | 1.535       | 1.534       | 1.526      | 1.527      | C3-C18                 | 1.533                  |
|                            |                    | C21-C6          | 1.505       | 1.506       | 1.485      | 1.487      | C18-C6                 | 1.508                  |
|                            |                    | C6-O5           | 1.428       | 1.428       | 1.422      | 1.418      | C6-O5                  | 1.429                  |
|                            |                    |                 |             |             |            |            |                        |                        |
|                            | Angles, °          | O5-C26-C22      | 114.2       | 114.1       | 113.6      | 112.0      | O5-C23-C19             | 113.6                  |
|                            |                    | C26-C22-C3      | 108.6       | 108.6       | 108.7      | 110.1      | C23-C19-C3             | 108.7                  |
|                            |                    | C22-C3-C21      | 107.3       | 107.3       | 106.4      | 106.0      | C19-C3-C18             | 107.1                  |
|                            |                    | C3-C21-C6       | 103.6       | 103.6       | 103.4      | 103.8      | C3-C18-C6              | 103.4                  |
|                            |                    | C21-C6-O5       | 110.8       | 110.9       | 110.1      | 109.8      | C18-C6-O5              | 110.7                  |
|                            |                    | C6-O5-C26       | 116.3       | 116.3       | 115.3      | 114.8      | C6-O5-C23              | 116.4                  |
|                            | Dihedral angles, ° | O5-C26-C22-C3   | -42.9       | -43.1       | -44.0      | -45.5      | O5-C23-C19-C3          | -43.6                  |
|                            |                    | C26-C22-C3-C21  | 57.2        | 57.4        | 57.1       | 57.2       | C23-C19-C3-C18         | 58.3                   |
|                            |                    | C22-C3-C21-C6   | -69.0       | -69.0       | -69.7      | -68.1      | C19-C3-C18-C6          | -69.3                  |
|                            |                    | C3-C21-C6-O5    | 68.6        | 68.4        | 71.1       | 71.1       | C3-C18-C6-O5           | 68.4                   |
|                            |                    | C21-C6-O5-C26   | -56.8       | -56.8       | -60.3      | 61.6       | C18-C6-O5-C23          | -57.0                  |
|                            |                    | C6-O5-C26-C22   | 43.5        | 43.6        | 45.9       | 47.6       | C6-O5-C23-C19          | 44.0                   |
|                            | Bonds, Å           | C8-C6           | 1.537       | 1.537       | 1.518      | 1.528      | C8-C6                  | 1.542                  |
|                            |                    | C3-C10          | 1.578       | 1.579       | 1.563      | 1.563      | C3-C10                 | 1.568                  |
|                            |                    | C10-C8          | 1.551       | 1.551       | 1.522      | 1.529      | C10-C8                 | 1.557                  |

|                            |                    |                 |          |          |         |        |                 |        |
|----------------------------|--------------------|-----------------|----------|----------|---------|--------|-----------------|--------|
| C<br>-<br>r<br>i<br>n<br>g | Angles, °          | C6-C21-C3       | 103.6    | 103.6    | 103.4   | 103.8  | C6-C18-C3       | 103.4  |
|                            |                    | C21-C3-C10      | 99.8     | 99.8     | 100.6   | 100.1  | C18-C3-C10      | 99.0   |
|                            |                    | C3-C10-C8       | 106.6    | 106.6    | 105.8   | 105.9  | C3-C10-C8       | 107.2  |
|                            |                    | C10-C8-C6       | 104.2    | 104.2    | 105.4   | 105.6  | C10-C8-C6       | 103.7  |
|                            |                    | C8-C6-C21       | 101.3    | 101.3    | 101.1   | 100.8  | C8-C6-C18       | 101.5  |
|                            | Dihedral angles, ° | C6-C21-C3-C10   | 44.0     | 44.0     | 42.8    | 44.5   | C6-C18-C3-C10   | 46.2   |
|                            |                    | C21-C3-C10-C8   | -21.6    | -21.5    | -20.2   | -22.8  | C18-C3-C10-C8   | -25.4  |
|                            |                    | C3-C10-C8-C6    | -7.4     | -7.6     | -8.6    | -5.8   | C3-C10-C8-C6    | -3.4   |
|                            |                    | C10-C8-C6-C21   | 34.3     | 34.5     | 35.0    | 32.9   | C10-C8-C6-C18   | 31.7   |
|                            |                    | C8-C6-C21-C3    | -49.9    | -50.0    | -48.9   | -48.8  | C8-C6-C18-C3    | -50.0  |
| E<br>-<br>r<br>i<br>n<br>g | Bonds, Å           | C21-O63         | 1.436    | 1.436    | 1.453   | 1.454  | C18-O33         | 1.438  |
|                            |                    | O63-C64         | 1.437    | 1.437    | 1.444   | 1.462  | O33-C34         | 1.438  |
|                            |                    | C21-C64         | 1.460    | 1.460    | 1.460   | 1.448  | C34-C18         | 1.459  |
|                            | Angles, °          | C64-C21-C3      | 128.6    | 128.6    | 128.1   | 127.7  | C34-C18-C3      | 128.6  |
|                            | Dihedral angles, ° | C64-C21-C3-C10  | -156.0   | -156.0   | -155.5  | -154.9 | C34-C18-C3-C10  | -153.3 |
| R<br>1                     | Bonds, Å           | C31-O46         | 1.462    | 1.462    | 1.470   | 1.479  |                 |        |
|                            |                    | O46-C47         | 1.353    | 1.356    | 1.346   | 1.328  |                 |        |
|                            |                    | C47-O48         | 1.206    | 1.205    | 1.202   | 1.215  |                 |        |
|                            |                    | O48-H62         | 2.295    | 2.195    |         |        |                 |        |
|                            | Angles, °          | C54-C52-C53     | 111.2    | 111.2    | 104.1   | 109.5  |                 |        |
|                            | Dihedral angles, ° | C23-C31-O46-C47 | 87.3     | 119.1    | 83.4    | 118.0  |                 |        |
|                            |                    | C31-O46-C47-C49 | 179.4    | -177.5   | 172.0   | -175.7 |                 |        |
|                            |                    | O46-C47-C49-C52 | -154.466 | -154.419 | -77.705 | -87.2  |                 |        |
|                            |                    | C47-C49-C52-C53 | -168.6   | -168.6   | -180.3  | -174.1 |                 |        |
| R<br>2                     | Bonds, Å           | C22-C36         | 1.542    | 1.543    | 1.532   | 1.546  | C19-C29         | 1.541  |
|                            |                    | C36-O39         | 1.443    | 1.442    | 1.442   | 1.458  | C29-O40         | 1.446  |
|                            |                    | C40-C39         | 1.353    | 1.352    | 1.338   | 1.331  | O40-C41         | 1.353  |
|                            |                    | C40-C41         | 1.202    | 1.203    | 1.175   | 1.187  | C41-O42         | 1.203  |
|                            |                    | O41-H37         | 2.708    | 2.872    |         |        | O42-H30         | 2.585  |
|                            |                    | O41-H38         | 2.479    | 2.385    |         |        | O42-H31         | 2.596  |
|                            | Dihedral angles, ° | C3-C22-C36-O39  | 71.5     | 72.1     | 73.2    | 72.8   | C3-C19-C29-O40  | 79.6   |
|                            |                    | C22-C36-O39-C40 | 172.6    | 161.8    | 169.9   | 169.0  | C19-C29-O40-C41 | 179.9  |
| R<br>3                     |                    | C36-O39-C40-C42 | 173.9    | 176.2    | 178.6   | 180.5  | C29-O40-C41-C43 | 179.8  |
|                            | Bonds, Å           | C10-O18         | 1.442    | 1.442    | 1.439   | 1.460  |                 |        |
|                            |                    | C19-O18         | 1.354    | 1.354    | 1.355   | 1.337  |                 |        |
|                            |                    | C19-O20         | 1.205    | 1.205    | 1.177   | 1.206  |                 |        |
|                            |                    | O20-H11         | 2.289    | 2.281    |         |        |                 |        |
| R<br>4                     | Dihedral angles, ° | C8-C10-O18-C19  | -143.5   | -142.4   | -138.8  | -116.7 |                 |        |
|                            | Bonds, Å           | C8-O16          | 1.415    | 1.415    | 1.410   | 1.422  | C8-O16          | 1.420  |
|                            |                    | O5-H17          | 2.221    | 2.221    |         |        | O5-H17          | 2.189  |
|                            | Angles, °          | C6-C8-O16       | 113.3    | 113.3    | 112.4   | 116.7  | C6-C8-O16       | 112.7  |
|                            | Dihedral angles, ° | H17-O16-C8-C6   | -10.2    | -10.3    |         |        | H17-O16-C8-C6   | -5.4   |

**Table S2.** The comparison of selected calculated modes for model structures: ethyl acetate, tetrahydropyran, cyclopentanol with scaled calculated frequency for 3-deacetylcalonecrin.

| Model           | Calculated frequency for model structure, $\text{cm}^{-1}$ | Calculated scaled frequency for model structure, $\text{cm}^{-1}$ | 3-deacetylcalonecrin similar vibrational mode unscaled frequency, $\text{cm}^{-1}$ | Type of significant contribution in model (see notations at figure S1) |
|-----------------|------------------------------------------------------------|-------------------------------------------------------------------|------------------------------------------------------------------------------------|------------------------------------------------------------------------|
| Ethyl acetate   | 1065                                                       | 1047                                                              | 1040                                                                               | $\nu(\text{C5O8})$ ,                                                   |
|                 | 1262                                                       | 1241                                                              | 1233                                                                               |                                                                        |
|                 | 1803                                                       | 1772                                                              | 1772                                                                               |                                                                        |
| Tetrahydropyran | 1101                                                       | 1082                                                              | 1061                                                                               | asym( $\text{C8O1C5}$ )                                                |
| Cyclopentanol   | 285                                                        | 280                                                               | 252, 370, 388                                                                      | tors( $\text{C4C3O15H16}$ )                                            |
|                 | 1072                                                       | 1054                                                              | 1032                                                                               | $\nu(\text{C3C2})$                                                     |
|                 | 1095                                                       | 1076                                                              | 1044                                                                               | $\nu(\text{C3O15})$                                                    |

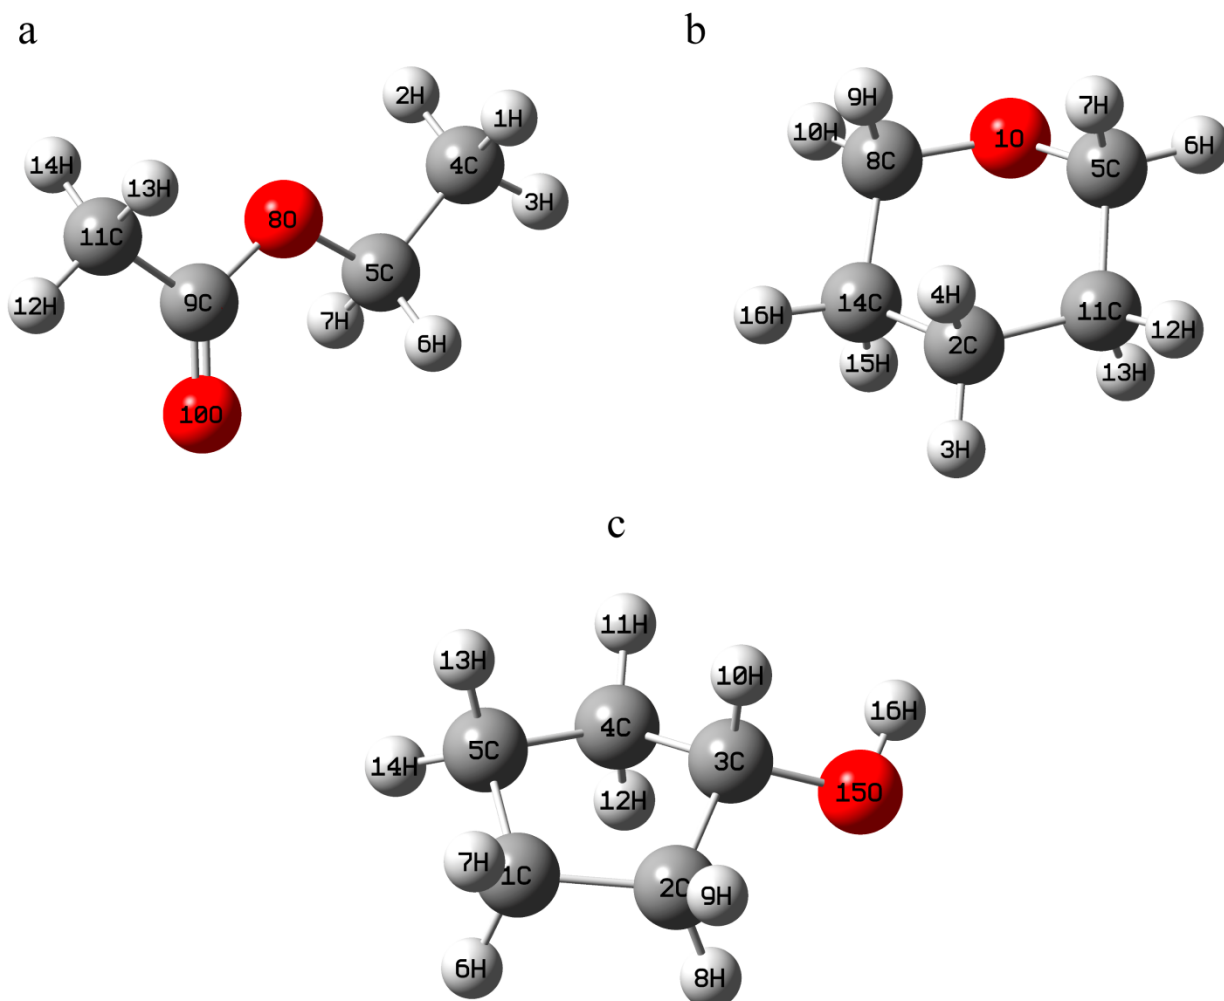

**Figure S1.** Optimized structures of several models: ethyl acetate (a), tetrahydropyran (b), cyclopentanol (c).

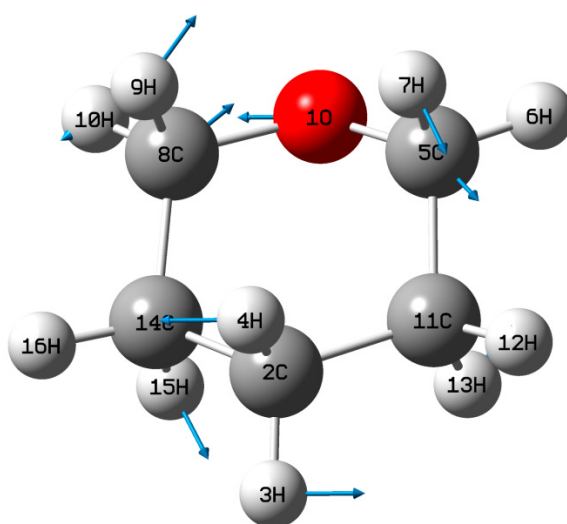

**Figure S2.** The tetrahydropyran mode with significant contribution of asymmetric C8O1C5 stretching vibrations.

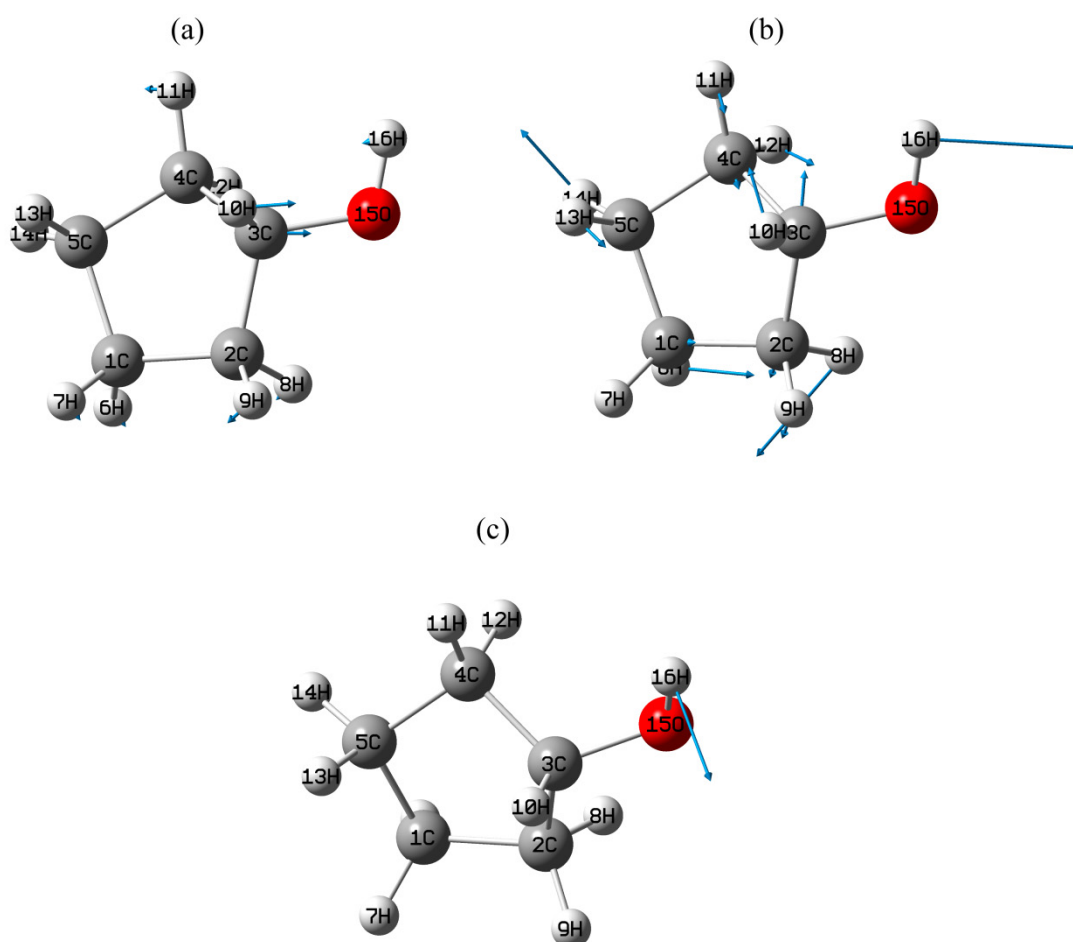

**Figure S3.** Selected vibrational modes calculated for cyclopentanol models structure: 1076(a), 1054(b) and 280 (c)  $\text{cm}^{-1}$

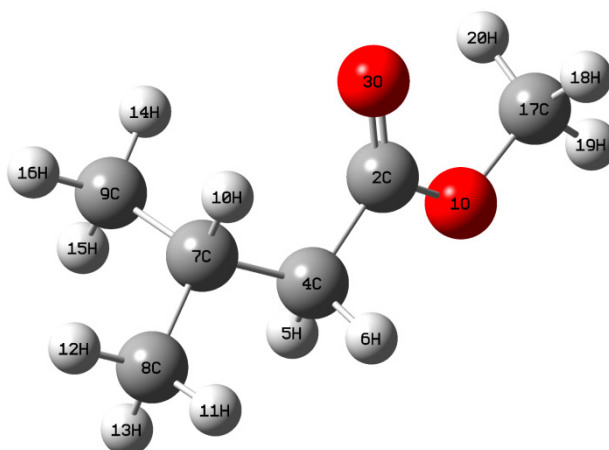

**Figure S4.** Optimized structure of methyl 3-methylbutanoate.

**Table S3.** The comparison of selected calculated modes for methyl 3-methylbutanoate with scaled calculated frequency for T-2 toxin.

| Model                    | Calculated frequency for model structure, $\text{cm}^{-1}$ | Calculated scaled frequency for model structure, $\text{cm}^{-1}$ | T-2 toxin similar vibrational mode unscaled frequency, $\text{cm}^{-1}$ | Type of significant contribution in model (see notations at figure S4)                                                                                                                                                                                                                                                        |
|--------------------------|------------------------------------------------------------|-------------------------------------------------------------------|-------------------------------------------------------------------------|-------------------------------------------------------------------------------------------------------------------------------------------------------------------------------------------------------------------------------------------------------------------------------------------------------------------------------|
| Methyl 3-methylbutanoate | 1143                                                       | 1124                                                              | 1109                                                                    | predominantly $\nu(\text{C}^2\text{O}^1)$ , $\delta(\text{H}^7\text{C}^8\text{C}^{13})$ , $\delta(\text{H}^{10}\text{C}^7\text{C}^9)$ , $\delta(\text{H}^5\text{C}^4\text{C}^2)$                                                                                                                                              |
|                          | 1190                                                       | 1170                                                              | 1166<br>1163                                                            | $\nu(\text{C}^2\text{O}^1)$ , $\nu(\text{C}^7\text{C}^4)$ , $w(\text{H}^5\text{C}^4\text{H}^6)$ , $\delta(\text{H}^{10}\text{C}^7\text{C}^4)$ , $q(\text{H}^{12}\text{C}^8\text{H}^{11})$ , $q(\text{H}^{12}\text{C}^8\text{H}^{13})$ , $q(\text{H}^{14}\text{C}^9\text{H}^{16})$ , $q(\text{H}^{14}\text{C}^9\text{H}^{15})$ |
|                          | 1217                                                       | 1196                                                              | 1183                                                                    | $\nu(\text{C}^2\text{O}^1)$ , $w(\text{H}^{20}\text{C}^{17}\text{H}^{18})$ , $w(\text{H}^5\text{C}^4\text{H}^6)$ , $\delta(\text{H}^{10}\text{C}^7\text{C}^8)$ , $\delta(\text{H}^5\text{C}^4\text{C}^7)$ , $\delta(\text{H}^{13}\text{C}^8\text{C}^7)$ , $\delta(\text{C}^9\text{C}^7\text{C}^8)$                            |
|                          | 1326                                                       | 1303                                                              | 1300                                                                    | predominantly $w(\text{H}^5\text{C}^4\text{H}^6)$ , $\delta(\text{C}^8\text{C}^7\text{H}^{10})$ , $\nu(\text{C}^4\text{C}^2)$ , $\nu(\text{C}^2\text{O}^1)$ with addition of $q(\text{H}^{13}\text{C}^8\text{H}^{11})$ , $q(\text{H}^{13}\text{C}^8\text{H}^{12})$                                                            |
|                          | 1397                                                       | 1373                                                              | 1376                                                                    | $\delta(\text{H}^{10}\text{C}^7\text{C}^4)$ , $\delta(\text{H}^5\text{C}^4\text{C}^7)$                                                                                                                                                                                                                                        |
|                          | 1794                                                       | 1764                                                              |                                                                         | $\nu(\text{CO})$                                                                                                                                                                                                                                                                                                              |
|                          | 3013                                                       | 2962                                                              | 2964                                                                    | anti-phase $\nu_{\text{sym}}(\text{C}^8\text{H}_3)$ , $\nu_{\text{sym}}(\text{C}^9\text{H}_3)$                                                                                                                                                                                                                                |
|                          | 3016                                                       | 2965                                                              | 2966                                                                    | in-phase $\nu_{\text{sym}}(\text{C}^8\text{H}_3)$ , $\nu_{\text{sym}}(\text{C}^9\text{H}_3)$ , $\nu(\text{C}^7\text{H}^{10})$ with small addition of $\nu_{\text{sym}}(\text{H}^5\text{C}^4\text{H}^6)$                                                                                                                       |
|                          | 3079                                                       | 3027                                                              | 3029                                                                    | $\nu_{\text{asym}}(\text{C}^8\text{H}_3)$ , $\nu(\text{H}^{19}\text{C}^9\text{H}^{15})$ , $\nu(\text{H}^5\text{C}^4\text{H}^6)$ , $\nu(\text{C}^7\text{H}^{10})$                                                                                                                                                              |
|                          | 3084                                                       | 3032                                                              | 3033                                                                    | $\nu_{\text{asym}}(\text{C}^8\text{H}_3)$ , $\nu_{\text{asym}}(\text{C}^9\text{H}_3)$ , $\nu(\text{C}^7\text{H}^{10})$                                                                                                                                                                                                        |
